# Supplementary material for: Characterization of the mitochondrial genome, cox1 intron dynamics and phylogenetic analysis of Fusarium species causing basal rot in onions
Source: Research Square preprint supplement (doi:10.21203/rs.3.rs-7722832/v1), 2025-10-17
Supplement: Supplementary file 1 [file 0e451fbe2279ad796c4d389e.xlsx]

## Sheet: Sheet1
Title:
Characterization of the mitochondrial genome, cox1 intron dynamics and phylogenetic analysis of Fusarium species causing basal rot in onions.
Author Affiliations
1. ICAR-Directorate of Onion and Garlic Research, Pune, Maharashtra, India, 410505.
Auji Radhakrishna, Satish Kumar, Jayalakshmi K, Vijay Mahajan & Ram Dutta
2. Department of Biotechnology, Mahatma Gandhi University, Nalgonda, Telangana, India, 508254.
Auji Radhakrishna, Bhargavi A & Siva Ram T

## Sheet: Table S1
Table S1 The mitochondrial genomic information of three Fusarium mitogenomes
Feature	F. acutatum	F. proliferatum	F. oxysporum f. sp. cepae
GC%	32.25	32.87	32.22
A	17765	15739	16252
T	17240	15505	15808
G	9137	8398	8349
C	7525	6900	6893
AT skew	0.0149979	0.00748944	0.013849
GC skew	0.0967471	0.0979213	0.0955255
GC%	32.2488	32.8692	32.2227
AT%	67.7512	67.1308	67.7773
PCG % in mitogenome	30.6114	31.2041	30.6456
ORF% in mitogenome	21.3328	16.4045	19.2613
rRNA% in mitogenome	14.0418	15.3625	15.2742
tRNA% in mitogenome	3.87868	4.30794	4.08862

## Sheet: Table S2
Table S2 Characterization of the Three Fusarium mitogenomes
Fusarium acutatum							Fusarium proliferatum							Fusarium oxysporum . f. sp. cepae
Gene	Start	End	Size	Notes			Gene	Start	End	Size	Notes			Gene	Start	End	Size	Notes
nad2	1	2901	2901	NADH dehydrogenase subunit 2			nad2	1	1665	1665	NADH dehydrogenase subunit 2			nad2	1	1665	1665	NADH dehydrogenase subunit 2
nad3	3453	3866	414	NADH dehydrogenase subunit 3			nad3	1666	2079	414	NADH dehydrogenase subunit 3			nad3	1666	2079	414	NADH dehydrogenase subunit 3
atp9	4845	5069	225	ATP synthase F0 subunit c			atp9	2948	3172	225	ATP synthase F0 subunit c			atp9	2929	3153	225	ATP synthase F0 subunit c
cox2	6403	7152	750	cytochrome c oxidase subunit 2			cox2	4582	5331	750	cytochrome c oxidase subunit 2			cox2	4223	4972	750	cytochrome c oxidase subunit 2
trnR(acg)	7313	7383	71	tRNA-Arg			trnR(acg)	5605	5675	71	tRNA-Arg			trnR(acg)	5105	5175	71	tRNA-Arg
trnR(tcg)	7471	7541	71	tRNA-Arg			trnR(tcg)	5763	5833	71	tRNA-Arg			nad4L	5826	6095	270	NADH dehydrogenase subunit 4L
nad4L	7880	8149	270	NADH dehydrogenase subunit 4L			nad4L	6392	6661	270	NADH dehydrogenase subunit 4L			orf304	6812	7726	915	LAGLIDADG
orf304	8866	9780	915	LAGLIDADG			nad5	6661	8649	1989	NADH dehydrogenase subunit 5			nad5	6095	9093	2999	NADH dehydrogenase subunit 5
nad5	8149	11147	2999	NADH dehydrogenase subunit 5			trnR(tct)	9291	9361	71	tRNA-Arg			exon	6095	6811	717	nad5 exon1
exon	8149	8865	717	nad5 exon1			cob	10137	11309	1173	tRNA-Arg			exon	7822	9093	1272	nad5 exon2
exon	9876	11147	1272	nad5 exon2			trnC(gca)	11518	11590	73	tRNA-Cys			intron	6812	7821	1010	nad5 intron1
intron	8866	9875	1010	Group IB			cox1	13006	14598	1593	cytochrome c oxidase subunit 1			trnR(tct)	9559	9629	71	tRNA-Arg
trnR(tct)	11821	11891	71	tRNA-Arg			trnR(tct)	14868	14938	71	tRNA-Arg			orf292	11415	12293	879	GIY
orf102	12452	12144	308	G-orf102			orf151	15707	16162	456	G-orf151			cob	11022	13431	2410	apocytochrome b
cob	13319	14491	1173	apocytochrome b			nad1	16516	17625	1110	NADH dehydrogenase subunit 1			exon	11022	11414	393	cob exon1
trnC(gca)	14805	14877	73	tRNA-Cys			nad4	17723	19180	1458	NADH dehydrogenase subunit 4			exon	12652	13431	780	cob exon2
orf349	17076	18125	1050	G-orf349			atp8	19443	19589	147	ATP synthase F0 subunit 8			intron	11415	12651	1237	cob intron1
orf274	18660	19484	825	GIY			atp6	20104	20904	801	ATP synthase F0 subunit a			trnC(gca)	13662	13734	73	tRNA-Cys
cox1	16203	20013	3811	cytochrome c oxidase subunit 1			rns	21442	23115	1674	small subunit ribosomal RNA			cox1	15104	16696	1593	cytochrome c oxidase subunit 1
exon	16203	17075	873	cox1 exon1			trnY(gta)	23152	23235	84	tRNA-Tyr			trnR(tct)	16967	17037	71	tRNA-Arg
exon	18264	18658	395	cox1 exon2			trnD(gtc)	23236	23309	74	tRNA-Asp			orf151	17782	18237	456	G-orf151
exon	19689	20013	325	cox1 exon3			trnS(gct)	23566	23647	82	tRNA-Ser			nad1	18682	19791	1110	NADH dehydrogenase subunit 1
intron	17076	18263	1188	cox1 intron1			trnN(gtt)	23855	23925	71	tRNA-Asn			nad4	20023	21480	1458	NADH dehydrogenase subunit 4
intron	18659	19688	1030	cox1 intron2			cox3	23971	24780	810	cytochrome c oxidase subunit 3			atp8	21616	21762	147	ATP synthase F0 subunit 8
trnR(tct)	20298	20368	71	tRNA-Arg			nad6	25930	26601	672	NADH dehydrogenase subunit 6			atp6	21989	22789	801	ATP synthase F0 subunit a
orf151	21017	21472	456	G-orf151			trnV(tac)	26796	26867	72	tRNA-Val			rns	23417	25079	1663	small subunit ribosomal RNA
nad1	21839	22948	1110	NADH dehydrogenase subunit 1			trnI(gat)	26984	27055	72	tRNA-Ile			trnY(gta)	25116	25199	84	tRNA-Tyr
nad4	23248	24771	1524	NADH dehydrogenase subunit 4			trnS(tga)	27057	27144	88	tRNA-Ser			trnD(gtc)	25200	25273	74	tRNA-Asp
atp8	24908	25054	147	ATP synthase F0 subunit 8			trnW(tca)	27145	27216	72	tRNA-Trp			trnS(gct)	25508	25589	82	tRNA-Ser
atp6	25524	26324	801	ATP synthase F0 subunit a			trnP(tgg)	27230	27302	73	tRNA-Pro			trnN(gtt)	26035	26105	71	tRNA-Asn
rns	27135	28798	1664	small subunit ribosomal RNA			rnl	27654	33129	5476	large subunit ribosomal RNA			cox3	26151	26960	810	cytochrome c oxidase subunit 3
trnY(gta)	28835	28918	84	tRNA-Tyr			rps3	30830	32275	1446	Ribosomal protein S3			nad6	27884	28552	669	NADH dehydrogenase subunit 6
trnD(gtc)	28919	28992	74	tRNA-Asp			trnT(tgt)	33485	33555	71	tRNA-Thr			trnV(tac)	28854	28925	72	tRNA-Val
trnS(gct)	29241	29322	82	tRNA-Ser			trnE(ttc)	33637	33708	72	tRNA-Glu			trnI(gat)	29051	29122	72	tRNA-Ile
trnN(gtt)	29615	29685	71	tRNA-Asn			trnM(cat)	33710	33780	71	tRNA-Met			trnS(tga)	29124	29211	88	tRNA-Ser
cox3	29731	30540	810	cytochrome c oxidase subunit 3			trnM(cat)	33781	33853	73	tRNA-Met			trnW(tca)	29212	29283	72	tRNA-Trp
nad6	31528	32199	672	NADH dehydrogenase subunit 6			trnG(tcc)	33859	33929	71	tRNA-Gly			trnP(tgg)	29294	29366	73	tRNA-Pro
trnV(tac)	32521	32592	72	tRNA-Val			trnL(taa)	34728	34809	82	tRNA-Leu			rnl	29719	35280	5562	large subunit ribosomal RNA
trnI(gat)	32652	32723	72	tRNA-Ile			orf2392	35478	42656	7179	G-orf2392			rps3	32855	34282	1428	Ribosomal protein S3
trnS(tga)	32725	32812	88	tRNA-Ser			trnA(tgc)	43161	43232	72	tRNA-Ala			trnT(tgt)	35546	35616	71	tRNA-Thr
trnW(tca)	32813	32884	72	tRNA-Trp			trnF(gaa)	43712	43784	73	tRNA-Phe			trnE(ttc)	35677	35748	72	tRNA-Glu
trnP(tgg)	32897	32969	73	tRNA-Pro			trnK(ttt)	44227	44299	73	tRNA-Lys			trnM(cat)	35750	35820	71	tRNA-Met
rnl	33342	38932	5591	large subunit ribosomal RNA			trnL(tag)	44639	44721	83	tRNA-Leu			trnM(cat)	35821	35893	73	tRNA-Met
exon	33342	36047	2706	rnl exon1			trnQ(ttg)	45253	45324	72	tRNA-Gln			trnG(tcc)	35899	35969	71	tRNA-Gly
exon	38299	38932	634	rnl exon2			trnH(gtg)	45614	45687	74	tRNA-His			trnL(taa)	36535	36616	82	tRNA-Leu
intron	36048	38298	2251	Group IA			trnM(cat)	46403	46475	73	tRNA-Met			orf2286	37313	44173	6861	G-orf2286
rps3	36479	37915	1437	ribosomal protein S3										trnA(tgc)	44640	44711	72	tRNA-Ala
trnT(tgt)	39228	39298	71	tRNA-Thr										trnF(gaa)	44717	44789	73	tRNA-Phe
trnE(ttc)	39380	39451	72	tRNA-Glu										trnK(ttt)	45228	45300	73	tRNA-Lys
trnM(cat)	39453	39523	71	tRNA-Met										trnL(tag)	45796	45878	83	tRNA-Leu
trnM(cat)	39524	39596	73	tRNA-Met										trnQ(ttg)	46386	46457	72	tRNA-Gln
trnG(tcc)	39602	39672	71	tRNA-Gly										trnH(gtg)	46660	46733	74	tRNA-His
trnL(taa)	40257	40338	82	tRNA-Leu										trnM(cat)	47163	47235	73	tRNA-Met
orf2488	41058	48524	7467	hypothetical protein
trnA(tgc)	49036	49107	72	tRNA-Ala
trnF(gaa)	49374	49446	73	tRNA-Phe
trnK(ttt)	49818	49890	73	tRNA-Lys
trnL(tag)	50117	50199	83	tRNA-Leu
trnQ(ttg)	50703	50774	72	tRNA-Gln
trnH(gtg)	51006	51078	73	tRNA-His
trnM(cat)	51527	51599	73	tRNA-Met

## Sheet: Table S3
Table S5 Local BLAST analysis of three Fusarium species mitogenomes against themselves
Species (Query)	Species (Target)	Identity (%)	Aligned length (bp)	Mismatches	Gaps	Start (Query)	End (Query)	Start (Target)	End (Target)	E-value	Bit score
F. acutatum	F. acutatum	100	31	0	0	1752	1782	7828	7798	7.18e-09	58.4
F. acutatum	F. acutatum	97.436	39	0	1	3109	3146	49272	49234	4.29e-11	65.8
F. acutatum	F. acutatum	95.455	66	2	1	5305	5370	1921	1985	9.09e-23	104
F. acutatum	F. acutatum	100	28	0	0	14888	14915	14915	14888	3.34e-07	52.8
F. acutatum	F. acutatum	93.514	185	10	1	20294	20476	11817	12001	6.55e-74	274
F. acutatum	F. acutatum	96.063	127	3	2	23000	23125	21720	21845	2.42e-53	206
F. acutatum	F. acutatum	97.959	245	3	2	24646	24890	20755	20997	6.14e-119	424
F. acutatum	F. acutatum	95.455	44	0	2	26863	26905	26905	26863	3.32e-12	69.4
F. acutatum	F. acutatum	97.436	39	1	0	31165	31203	3144	3106	1.19e-11	67.6
F. acutatum	F. acutatum	94.737	38	2	0	31166	31203	40026	40063	2e-09	60.2
F. acutatum	F. acutatum	97.436	39	1	0	40026	40064	3143	3105	1.19e-11	67.6
F. acutatum	F. acutatum	94.737	38	2	0	40026	40063	31166	31203	2e-09	60.2
F. acutatum	F. acutatum	91.667	48	4	0	44899	44946	44386	44433	1.19e-11	67.6
F. acutatum	F. acutatum	91.379	58	5	0	45897	45954	45765	45822	1.53e-15	80.5
F. acutatum	F. acutatum	89.254	456	31	10	46685	47125	45275	45727	2.09e-158	555
F. acutatum	F. acutatum	96.166	313	10	1	47644	47954	45410	45722	4.58e-145	510
F. acutatum	F. acutatum	96.39	277	8	2	47679	47954	46845	47120	2.18e-128	455
F. acutatum	F. acutatum	97.297	37	1	0	49236	49272	40024	40060	1.54e-10	63.9
F. acutatum	F. acutatum	91.358	81	2	5	49238	49316	31166	31243	2.53e-23	106
F. acutatum	F. acutatum	94.737	57	3	0	49284	49340	2962	3018	2.55e-18	89.8
F. acutatum	F. acutatum	91.935	62	2	2	49563	49624	1920	1978	1.18e-16	84.2
F. acutatum	F. acutatum	92.063	63	3	1	49564	49626	5305	5365	9.16e-18	87.9
Species (Query)	Species (Target)	Identity (%)	Aligned length (bp)	Mismatches	Gaps	Start (Query)	End (Query)	Start (Target)	End (Target)	E-value	Bit score
F. proliferatum	F. proliferatum	97.812	320	7	0	41764	42083	39850	40169	6.09e-158	553
F. proliferatum	F. proliferatum	97.115	208	5	1	19055	19262	15443	15649	8.58e-97	350
F. proliferatum	F. proliferatum	96.985	199	5	1	43354	43552	15398	15201	8.64e-92	333
F. proliferatum	F. proliferatum	96.373	193	5	1	14864	15056	9287	9477	8.7e-87	316
F. proliferatum	F. proliferatum	96.175	183	1	4	19247	19423	15503	15685	4.08e-80	294
F. proliferatum	F. proliferatum	96.622	148	1	3	19247	19390	19116	19263	1.5e-64	243
F. proliferatum	F. proliferatum	96.386	83	1	2	44415	44495	8954	8872	2.62e-32	135
F. proliferatum	F. proliferatum	98.611	72	1	0	41234	41305	39707	39778	4.38e-30	128
F. proliferatum	F. proliferatum	91.304	92	5	2	11994	12084	3534	3445	2.04e-28	122
F. proliferatum	F. proliferatum	98.485	66	1	0	44426	44491	33365	33430	9.47e-27	117
F. proliferatum	F. proliferatum	100	62	0	0	34623	34684	34584	34645	3.41e-26	115
F. proliferatum	F. proliferatum	96.774	62	2	0	11826	11887	3567	3506	7.38e-23	104
F. proliferatum	F. proliferatum	100	50	0	0	34502	34551	2352	2401	1.6e-19	93.5
F. proliferatum	F. proliferatum	94.737	57	3	0	34033	34089	6240	6296	2.07e-18	89.8
F. proliferatum	F. proliferatum	87.5	72	7	2	40436	40506	40355	40425	3.46e-16	82.4
F. proliferatum	F. proliferatum	91.071	56	2	1	3230	3282	3445	3500	2.08e-13	73.1
F. proliferatum	F. proliferatum	90.741	54	5	0	39336	39389	38859	38912	2.08e-13	73.1
F. proliferatum	F. proliferatum	95.455	44	0	2	21169	21211	21211	21169	2.69e-12	69.4
F. proliferatum	F. proliferatum	88.462	52	4	2	4326	4376	4376	4326	4.5e-10	62.1
F. proliferatum	F. proliferatum	97.222	36	1	0	43366	43401	12254	12219	4.5e-10	62.1
F. proliferatum	F. proliferatum	97.222	36	1	0	15352	15387	12219	12254	4.5e-10	62.1
F. proliferatum	F. proliferatum	100	30	0	0	34378	34407	33560	33589	2.09e-08	56.5
F. proliferatum	F. proliferatum	96.97	33	1	0	45985	46017	34074	34042	2.09e-08	56.5
F. proliferatum	F. proliferatum	100	30	0	0	33560	33589	34378	34407	2.09e-08	56.5
F. proliferatum	F. proliferatum	100	29	0	0	45841	45869	15352	15380	7.53e-08	54.7
F. proliferatum	F. proliferatum	100	29	0	0	45841	45869	43401	43373	7.53e-08	54.7
F. proliferatum	F. proliferatum	100	28	0	0	38943	38970	38889	38916	2.71e-07	52.8
Species (Query)	Species (Target)	Identity (%)	Aligned length (bp)	Mismatches	Gaps	Start (Query)	End (Query)	Start (Target)	End (Target)	E-value	Bit score
F. oxysporum f. sp. cepae	F. oxysporum f. sp. cepae	86.93	329	23	11	42670	42982	41188	41512	2.46e-97	351
F. oxysporum f. sp. cepae	F. oxysporum f. sp. cepae	98.404	188	2	1	21423	21610	17592	17778	1.15e-90	329
F. oxysporum f. sp. cepae	F. oxysporum f. sp. cepae	86	300	24	5	43547	43843	41330	41614	1.95e-83	305
F. oxysporum f. sp. cepae	F. oxysporum f. sp. cepae	94.792	192	7	2	16966	17155	9558	9748	1.17e-80	296
F. oxysporum f. sp. cepae	F. oxysporum f. sp. cepae	96.947	131	4	0	43576	43706	42829	42959	7.25e-58	220
F. oxysporum f. sp. cepae	F. oxysporum f. sp. cepae	87.435	191	17	5	40689	40874	40626	40814	1.21e-55	213
F. oxysporum f. sp. cepae	F. oxysporum f. sp. cepae	95.833	96	4	0	41668	41763	41521	41616	2.07e-38	156
F. oxysporum f. sp. cepae	F. oxysporum f. sp. cepae	93.333	90	5	1	19815	19904	18581	18669	3.49e-31	132
F. oxysporum f. sp. cepae	F. oxysporum f. sp. cepae	94.667	75	4	0	45532	45606	25950	25876	9.79e-27	117
F. oxysporum f. sp. cepae	F. oxysporum f. sp. cepae	94.521	73	3	1	45534	45606	44993	45064	4.55e-25	111
F. oxysporum f. sp. cepae	F. oxysporum f. sp. cepae	94.366	71	3	1	44996	45065	25945	25875	5.89e-24	108
F. oxysporum f. sp. cepae	F. oxysporum f. sp. cepae	89.873	79	8	0	41869	41947	41788	41866	2.74e-22	102
F. oxysporum f. sp. cepae	F. oxysporum f. sp. cepae	89.744	78	8	0	40196	40273	40157	40234	9.86e-22	100
F. oxysporum f. sp. cepae	F. oxysporum f. sp. cepae	83.333	108	15	2	40758	40862	40635	40742	1.27e-20	97.1
F. oxysporum f. sp. cepae	F. oxysporum f. sp. cepae	96.552	58	1	1	25888	25944	13632	13575	4.59e-20	95.3
F. oxysporum f. sp. cepae	F. oxysporum f. sp. cepae	96.552	58	1	1	44997	45053	13575	13632	4.59e-20	95.3
F. oxysporum f. sp. cepae	F. oxysporum f. sp. cepae	96.552	58	1	1	13575	13632	44997	45053	4.59e-20	95.3
F. oxysporum f. sp. cepae	F. oxysporum f. sp. cepae	94.828	58	2	1	45538	45594	13575	13632	2.13e-18	89.8
F. oxysporum f. sp. cepae	F. oxysporum f. sp. cepae	95.455	44	0	2	23145	23187	23187	23145	2.78e-12	69.4
F. oxysporum f. sp. cepae	F. oxysporum f. sp. cepae	95.122	41	0	2	13570	13608	10735	10775	1.29e-10	63.9
F. oxysporum f. sp. cepae	F. oxysporum f. sp. cepae	100	32	0	0	25911	25942	10775	10744	1.67e-09	60.2
F. oxysporum f. sp. cepae	F. oxysporum f. sp. cepae	92.308	39	2	1	45534	45571	10737	10775	7.78e-08	54.7
F. oxysporum f. sp. cepae	F. oxysporum f. sp. cepae	96.875	32	1	0	44999	45030	10744	10775	7.78e-08	54.7
F. oxysporum f. sp. cepae	F. oxysporum f. sp. cepae	94.286	35	1	1	47062	47095	18407	18373	2.8e-07	52.8

## Sheet: Table S4
Table S4 Distribution of repeat loci in Fusarium mitogenomes using REPuter (F: Forward; R: Reverse; P: Palindromic; C: Complementary)
Fusarium acutatum
1st repeat length	Starting position	Match direction	2nd repeat length	Starting position	E-value
186	20775	F	186	24667	7.8e-104
130	45556	F	130	46954	4.05e-70
114	45587	F	114	47819	1.74e-60
99	46985	F	99	47819	1.87e-51
93	46891	F	93	47725	7.65e-48
67	45488	F	67	47720	3.45e-32
64	11816	F	64	20293	2.21e-30
62	45493	F	62	46891	3.53e-29
61	21749	F	61	23029	1.41e-28
52	45274	F	52	46684	3.7e-23
51	1927	F	51	5312	1.48e-22
45	20952	F	45	24845	6.06e-19
43	45327	F	43	46737	9.7e-18							1st repeat length	Starting position	Match direction	2nd repeat length	Starting position	E-value
41	2977	F	41	49299	1.55e-16
41	11944	F	41	20419	1.55e-16
39	1928	F	39	49572	2.48e-15
39	5313	F	39	49572	2.48e-15
36	44332	F	36	44503	1.59e-13
35	45787	F	35	45919	6.36e-13
34	45806	F	34	45821	2.54e-12
33	45435	F	33	47667	1.02e-11
32	44437	F	32	44464	4.07e-11
31	31172	F	31	40032	1.63e-10
31	40029	F	31	49241	1.63e-10
31	46851	F	31	47685	1.63e-10
30	14695	F	30	31290	6.51e-10
30	45556	F	30	47788	6.51e-10
29	21719	F	29	22999	2.6e-09
29	44404	F	29	44917	2.6e-09
28	31172	F	28	49244	1.04e-08
27	1838	F	27	15309	4.17e-08
26	2975	F	26	15305	1.67e-07
25	11252	F	25	32360	6.67e-07
25	44411	F	25	44438	6.67e-07
25	44411	F	25	44465	6.67e-07
24	15307	F	24	49299	2.67e-06
24	21815	F	24	23094	2.67e-06
24	48004	F	24	48157	2.67e-06
36	26866	P	36	26866	1.59e-13
35	3104	P	35	40029	6.36e-13
35	3108	P	35	49237	6.36e-13
31	1751	P	31	7797	1.63e-10
31	3105	P	31	31172	1.63e-10
29	14645	P	29	29489	2.6e-09
28	14887	P	28	14887	1.04e-08
28	33841	P	28	33841	1.04e-08
26	32301	P	26	32301	1.67e-07
24	2964	P	24	2964	2.67e-06
29	21611	R	29	21611	2.6e-09
24	21617	R	24	21617	2.67e-06
Fusarium proliferatum
1st repeat length	Starting position	Match direction	2nd repeat length	Starting position	E-value
165	15484	F	165	19097	2.79e-91
135	39899	F	135	41813	3.21e-73
128	19135	F	128	19262	5.26e-69
127	15522	F	127	19262	2.1e-68
86	9289	F	86	14866	1.02e-43
62	34583	F	62	34622	2.86e-29
60	39706	F	60	41233	4.58e-28
56	40080	F	56	41994	1.17e-25
55	38888	F	55	38915	4.69e-25
50	2351	F	50	34501	4.81e-22
48	9383	F	48	14960	7.69e-21
44	40035	F	44	41949	1.97e-18
43	15642	F	43	19380	7.87e-18
43	33387	F	43	44448	7.87e-18
40	6256	F	40	34049	5.04e-16
35	40390	F	35	40471	5.16e-13
33	3229	F	33	3444	8.26e-12
32	40137	F	32	42051	3.3e-11
31	2350	F	31	45086	1.32e-10
31	12223	F	31	15356	1.32e-10
30	33559	F	30	34377	5.28e-10
30	34501	F	30	45087	5.28e-10
30	38882	F	30	39359	5.28e-10
29	9431	F	29	15010	2.11e-09
29	15351	F	29	45840	2.11e-09
28	38888	F	28	38942	8.45e-09
27	3453	F	27	43909	3.38e-08
26	3960	F	26	43439	1.35e-07
76	15314	P	76	43362	1.07e-37
58	15255	P	58	43439	7.33e-27
52	3515	P	52	11825	3e-23
51	8903	P	51	44414	1.2e-22
48	3472	P	48	12007	7.69e-21
44	15210	P	44	43498	1.97e-18
36	21172	P	36	21172	1.29e-13
31	12223	P	31	43365	1.32e-10
30	4335	P	30	4335	5.28e-10
30	34044	P	30	45984	5.28e-10
30	45376	P	30	45376	5.28e-10
29	11881	P	29	33342	2.11e-09
29	11893	P	29	23803	2.11e-09
29	43372	P	29	45840	2.11e-09
28	3910	P	28	3910	8.45e-09
28	3915	P	28	5523	8.45e-09
27	5542	P	27	8754	3.38e-08
27	5545	P	27	44360	3.38e-08
26	3960	P	26	15287	1.35e-07
26	8871	P	26	44469	1.35e-07
26	11888	P	26	25696	1.35e-07
26	25695	P	26	35413	1.35e-07
Fusarium oxysporum f. sp. cepae
1st repeat length	Starting position	Match direction	2nd repeat length	Starting position	E-value
28	18380	C	28	47061	8.73e-09
28	18387	C	28	47061	8.73e-09
28	18394	C	28	47061	8.73e-09
176	17591	F	176	21422	6.86e-98
86	9557	F	86	16965	1.05e-43
74	41402	F	74	42872	1.76e-36
72	41329	F	72	43546	2.82e-35
64	41410	F	64	43627	1.85e-30
64	42880	F	64	43627	1.85e-30
51	44995	F	51	45536	1.24e-22
48	13579	F	48	45001	7.94e-21
48	41231	F	48	42713	7.94e-21
45	13579	F	45	45542	5.08e-19
44	42835	F	44	43582	2.03e-18
41	41187	F	41	42669	1.3e-16
40	41548	F	40	41695	5.21e-16
37	18379	F	37	18386	3.33e-14
36	41365	F	36	42835	1.33e-13
36	41475	F	36	43707	1.33e-13
35	9713	F	35	17120	5.33e-13
35	37165	F	35	46874	5.33e-13
35	41823	F	35	41904	5.33e-13
33	18636	F	33	19871	8.53e-12
33	40749	F	33	40809	8.53e-12
32	10743	F	32	13576	3.41e-11
32	14187	F	32	25872	3.41e-11
32	40649	F	32	40772	3.41e-11
31	40783	F	31	40843	1.36e-10
30	18379	F	30	18393	5.46e-10
29	10746	F	29	45001	2.18e-09
29	10746	F	29	45542	2.18e-09
29	40175	F	29	40214	2.18e-09
27	13803	F	27	27109	3.49e-08
26	40294	F	26	40360	1.4e-07
39	13574	P	39	25905	2.08e-15
36	23148	P	36	23148	1.33e-13
34	25905	P	34	45001	2.13e-12
34	25905	P	34	45542	2.13e-12
32	10743	P	32	25910	3.41e-11
28	18379	P	28	47061	8.73e-09
28	18386	P	28	47061	8.73e-09
28	18393	P	28	47061	8.73e-09
27	37167	P	27	44930	3.49e-08
27	44930	P	27	46876	3.49e-08
43	18379	R	43	18379	8.13e-18
38	18385	R	38	18385	8.33e-15
36	18379	R	36	18379	1.33e-13
31	18392	R	31	18392	1.36e-10
29	18379	R	29	18379	2.18e-09
27	47061	R	27	47061	3.49e-08

## Sheet: Table S5
Table S3: Tandem repeats detected in Fusarium mitogenomes using Tandem Repeats Finder
Fusarium acutatum
Position	Period size	Copy Number	Consensus Size	Percent Matches	Percent Indels	Score	Entropy (0-2)	Repeat Motif
1753--1807	21	2.6	21	94	0	101	1.9	AGCTTTAGCATGCTGATTTAT
7549--7592	16	2.8	16	92	0	70	1.57	TTATCGATAGTTTTGT
7950--7988	21	1.9	20	85	15	53	1.67	TAATGCTATTATCTATAAAA
20475--20504	13	2.4	12	94	5	51	1.48	ATTTAATACCTA
21612--21641	7	4.3	7	100	0	60	1.55	GCGAAGC
25294--25341	20	2.3	22	86	10	66	1.76	AATATGCATAGCTAGTAAAATA
30749--30811	21	3.1	21	86	4	85	1.62	TAAAGCTCTGTATTTTTTTTA
30752--30814	19	3.2	19	80	12	74	1.65	AGCTCTGTATTTTTTATAT
36882--36914	16	2.1	16	88	5	50	0.98	AAAAAAATATATTAAA
36894--36936	22	2	21	86	4	59	0.89	TAAAAAAAAAATAAGTAAAAA
36894--36943	23	2.3	22	82	6	57	0.93	TAAATAAAAAAATAGTAAAAAA
40092--40165	39	1.9	39	91	2	123	1.48	AAGATAGTTAAGAATAACAAATTTATTAGATATATAGGT
43914--44010	39	2.5	39	89	3	142	1.79	GATTCAAGTGAGGTTAATAGTATAGCAAGGGAAAATAAG
43952--44011	21	3	21	65	20	56	1.77	GGATTCAAGTGAGGTTAATAA
43914--44030	39	3	38	86	3	126	1.79	GATTCAAGTGAGGTTAATAATACAGCAAAGGGAAAAAG
44030--44153	66	1.9	66	84	3	169	1.8	GGTACATTTTACTAAAGAAGACATAGATCACAAAAAAGGTAAAAAACCCGGGAAGTATTATAGAAA
44412--44496	27	3.1	27	98	0	161	1.94	GCCCCTCAAGAGCCAATTAATAGTCCT
44590--44634	21	2.1	21	83	0	54	1.67	CTAAACATATTCTTAATAAAT
44611--44724	36	3.2	36	85	0	156	1.85	CTAAACCTATTCTTAAGAAGTCTACAGATCATTATC
45043--45120	39	2	39	94	0	138	1.92	CTAAAAATAATAGTGGAGCAGCTGTTAAGGTTTCAGCTG
45807--45860	15	3.6	15	97	0	99	1.87	GATAGTTCTAGTGAG
45863--45915	24	2.2	24	86	0	70	1.92	TCCTGCACCAGGAGAAGCAGGGGA
46377--46429	18	2.9	18	88	0	70	1.85	AATAACCTAGAACGGTCA
48065--48104	15	2.7	15	88	0	53	1.76	TCCTAGCCAACTTAT
48415--48454	18	2.2	18	86	8	55	1.94	CTTCTGGGGTGGTAGACA
Fusarium proliferatum
Position	Period size	Copy Number	Consensus Size	Percent Matches	Percent Indels	Score	Entropy (0-2)	Repeat Motif
6282--6339	21	2.8	21	86	0	80	1.93	TCAGCAAGCTAAAGCTATAAA
6462--6500	21	1.9	20	85	15	53	1.67	TAATGCTATTATCTATAAAA
15045--15074	13	2.4	12	94	5	51	1.48	ATTTAATACCTA
19131--19390	127	2	127	99	0	511	1.8	TTTTTAACGTATTAGATTATTCTATGAATAGTTTAATATATAGTATATAAGCTTAGCTGCGCTTA
31242--31274	16	2.1	16	88	5	50	0.98	AAAAAAATATATTAAA
31254--31296	22	2	21	86	4	59	0.89	TAAAAAAAAAATAAGTAAAAA
31254--31303	23	2.3	22	82	6	57	0.93	TAAATAAAAAAATAGTAAAAAA
33393--33453	28	2.1	29	85	14	83	1.99	TAGCGCAGCCTTCAATAAGGCGCAAGCTC
34584--34684	39	2.6	39	100	0	202	1.71	TTATTAGATCTATAAGTGATATACAGAAGGATAAATTTG
38388--38502	39	2.9	39	86	0	158	1.77	GATTCAAATGAGGTTAATAGTATAGCAAAGGGAAAAAAG
38889--38970	27	3	27	100	0	164	1.88	CCTCAAGAGCCAATTAATAGTCCTCCC
38994--39077	36	2.5	33	84	5	96	1.79	CCTAAATATATTCTTAAGAAGCCTACAGATCAT
39484--39558	39	1.9	39	88	0	114	1.92	AAAATAATAATGGAGCAGCTGTTAAGGTTTCAGCTGCTC
40927--40978	18	2.9	18	85	0	68	1.89	ATAATCTAGAACGGTCAA
Fusarium oxysporum f. sp. cepae
Position	Period size	Copy Number	Consensus Size	Percent Matches	Percent Indels	Score	Entropy (0-2)	Repeat Motif
5183--5223	16	2.6	16	96	0	73	1.56	TTATCGATAATTTTGT
5896--5934	21	1.9	20	85	15	53	1.67	TAATGCTATTATCTATAAAA
17144--17168	13	1.9	13	100	0	50	1.52	ATTTAATACCTAC
18380--18423	7	6.3	7	100	0	88	1.55	GCGAAGC
25603--25642	6	6.3	6	88	11	62	1.75	TAGCTT
25603--25642	13	3.2	13	96	3	73	1.75	TAGCTTTTAGCTT
27194--27236	21	2	22	86	9	61	1.57	AGCTCTGTATTTTTTCTTATAT
33261--33303	22	2	21	86	4	59	0.89	TAAAAAAAAAATAAGTAAAAA
33261--33310	23	2.3	22	82	6	57	0.93	TAAATAAAAAAATAGTAAAAAA
36310--36371	26	2.3	27	91	2	99	1.78	TTAGTGAGAAAACACTTATTAGATCTT
36374--36448	39	1.9	39	97	0	141	1.61	AAGATAGTTAAGAATAACAAATTTATTAGATCTATATGT
40167--40273	39	2.7	39	92	0	178	1.81	AGGTTAATAGTATAGCAACGGGAAAAAGGGATCCAAGTA
40650--40874	60	3.7	60	84	6	283	1.98	TGCCGGCCCCTGAAGAGCCAATTAATAGTCCTGTACTACCTAAAGGATTAGTAAGAGTCT
40959--41033	39	1.9	39	94	0	132	1.94	AAAATAATAGTGGAGCAGCTGTTAAGGTTTCAGCTGCTC
42369--42414	18	2.6	18	92	0	74	1.84	TAGAACGGTCAAATAACA
43687--43721	15	2.3	15	100	0	70	1.69	TCCTAGCCTACTTCT
44081--44136	18	3.1	18	84	2	67	1.83	GGGGAGGTAGACGCTCCA
47062--47089	7	4	7	100	0	56	1.56	GCTTCGC

## Sheet: Table S6
Table S6 BLAST analysis of three Fusarium species mitogenomes against each other
Species (Query)	Species (Target)	Identity (%)	Aligned length (bp)	Mismatches	Gaps	Start (Query)	End (Query)	Start (Target)	End (Target)	E-value	Bit score
F. acutatum	F. proliferatum	98.397	3368	14	8	34780	38107	29100	32467	0	5884
F. acutatum	F. proliferatum	97.86	2850	29	10	26664	29482	20962	23810	0	4896
F. acutatum	F. proliferatum	97.414	2243	34	5	20719	22951	15400	17628	0	3799
F. acutatum	F. proliferatum	92.639	2092	117	9	47174	49241	41288	43366	0	2976
F. acutatum	F. proliferatum	91.648	1832	62	21	5440	7220	3604	5395	0	2451
F. acutatum	F. proliferatum	99.086	1641	9	2	23218	24853	17623	19262	0	2942
F. acutatum	F. proliferatum	99.388	1633	10	0	1	1633	1	1633	0	2961
F. acutatum	F. proliferatum	98.768	1380	16	1	9876	11254	7378	8757	0	2453
F. acutatum	F. proliferatum	98.611	1368	14	2	13248	14615	10067	11429	0	2416
F. acutatum	F. proliferatum	97.124	1217	10	8	32626	33839	26958	28152	0	2030
F. acutatum	F. proliferatum	98.803	1086	7	3	29594	30673	23834	24919	0	1929
F. acutatum	F. proliferatum	98.157	1085	20	0	15991	17075	12794	13878	0	1893
F. acutatum	F. proliferatum	99.438	1068	6	0	7798	8865	6310	7377	0	1940
F. acutatum	F. proliferatum	98.218	1010	16	2	31290	32298	25692	26700	0	1764
F. acutatum	F. proliferatum	97.842	973	12	5	25424	26388	20005	20976	0	1672
F. acutatum	F. proliferatum	99.89	908	1	0	33869	34776	28153	29060	0	1672
F. acutatum	F. proliferatum	94.934	908	24	10	19689	20594	14274	15161	0	1402
F. acutatum	F. proliferatum	99.66	882	2	1	38262	39143	32459	33339	0	1611
F. acutatum	F. proliferatum	94.943	870	41	1	45887	46756	40439	41305	0	1360
F. acutatum	F. proliferatum	96.502	829	23	1	4270	5098	2379	3201	0	1365
F. acutatum	F. proliferatum	93.819	728	26	10	24707	25425	19247	19964	0	1077
F. acutatum	F. proliferatum	96.483	654	14	4	3420	4073	1633	2277	0	1072
F. acutatum	F. proliferatum	92.447	609	21	10	49964	50565	44488	45078	0	846
F. acutatum	F. proliferatum	90.378	582	37	10	11477	12052	8955	9523	0	747
F. acutatum	F. proliferatum	97.574	577	6	4	39198	39774	33455	34023	0	981
F. acutatum	F. proliferatum	95.164	517	12	4	7284	7787	5573	6089	0	804
F. acutatum	F. proliferatum	91.968	498	15	8	30681	31169	25071	25552	0	675
F. acutatum	F. proliferatum	96.404	445	11	2	51226	51666	46099	46542	0	728
F. acutatum	F. proliferatum	97.985	397	8	0	18264	18660	13879	14275	0	689
F. acutatum	F. proliferatum	93.293	328	14	3	49637	49957	44040	44366	4.19e-135	477
F. acutatum	F. proliferatum	95.356	323	11	2	50833	51155	45446	45764	4.13e-145	510
F. acutatum	F. proliferatum	95.6	250	11	0	50570	50819	45120	45369	2.59e-112	401
F. acutatum	F. proliferatum	96.311	244	7	2	24646	24888	15443	15685	9.33e-112	399
F. acutatum	F. proliferatum	96.61	236	6	2	49340	49575	43678	43911	5.61e-109	390
F. acutatum	F. proliferatum	97.129	209	5	1	20755	20962	19055	19263	2.65e-97	351
F. acutatum	F. proliferatum	95.192	208	10	0	45623	45830	40226	40433	1.24e-90	329
F. acutatum	F. oxysporum f. sp. cepae	91.131	5277	317	74	39198	44436	35516	40679	0	7012
F. acutatum	F. oxysporum f. sp. cepae	98.96	3364	35	0	7833	11196	5779	9142	0	6019
F. acutatum	F. oxysporum f. sp. cepae	97.003	2736	47	17	26678	29397	22961	25677	0	4566
F. acutatum	F. oxysporum f. sp. cepae	98.359	1950	24	4	23199	25143	19905	21851	0	3417
F. acutatum	F. oxysporum f. sp. cepae	94.286	1680	39	22	29516	31169	25942	27590	0	2518
F. acutatum	F. oxysporum f. sp. cepae	89.615	1637	98	33	11411	13027	9165	10749	0	2015
F. acutatum	F. oxysporum f. sp. cepae	99.204	1633	13	0	1	1633	1	1633	0	2944
F. acutatum	F. oxysporum f. sp. cepae	95.398	1282	22	19	31327	32602	27685	28935	0	2006
F. acutatum	F. oxysporum f. sp. cepae	96.075	1223	13	15	32620	33835	29020	30214	0	1960
F. acutatum	F. oxysporum f. sp. cepae	96.631	1217	38	3	21772	22987	18614	19828	0	2017
F. acutatum	F. oxysporum f. sp. cepae	93.58	1106	56	5	45887	46992	41872	42962	0	1635
F. acutatum	F. oxysporum f. sp. cepae	96.429	1092	20	9	25427	26517	21892	22965	0	1783
F. acutatum	F. oxysporum f. sp. cepae	98.335	1081	18	0	6186	7266	4006	5086	0	1897
F. acutatum	F. oxysporum f. sp. cepae	98.332	1079	11	2	16001	17072	14895	15973	0	1886
F. acutatum	F. oxysporum f. sp. cepae	87.024	1025	100	14	44682	45694	40589	41592	0	1125
F. acutatum	F. oxysporum f. sp. cepae	97.768	941	14	3	13712	14652	12652	13585	0	1615
F. acutatum	F. oxysporum f. sp. cepae	94.857	875	23	3	20822	21679	17592	18461	0	1347
F. acutatum	F. oxysporum f. sp. cepae	93.647	850	16	11	4242	5089	2360	3173	0	1236
F. acutatum	F. oxysporum f. sp. cepae	92.781	845	37	11	19689	20528	16372	17197	0	1201
F. acutatum	F. oxysporum f. sp. cepae	95.952	840	19	9	49971	50800	45649	46483	0	1349
F. acutatum	F. oxysporum f. sp. cepae	90.294	783	43	10	47120	47884	43015	43782	0	994
F. acutatum	F. oxysporum f. sp. cepae	95.821	670	17	5	3420	4088	1633	2292	0	1072
F. acutatum	F. oxysporum f. sp. cepae	94.525	621	16	7	13094	13713	10813	11416	0	942
F. acutatum	F. oxysporum f. sp. cepae	86.731	618	53	13	48043	48631	43665	44282	0	660
F. acutatum	F. oxysporum f. sp. cepae	81.641	463	44	20	46685	47133	41188	41623	1.25e-95	346
F. acutatum	F. oxysporum f. sp. cepae	90	460	21	12	15523	15979	14359	14796	1.9e-163	571
F. acutatum	F. oxysporum f. sp. cepae	90.315	444	27	6	48702	49136	44304	44740	2.46e-162	568
F. acutatum	F. oxysporum f. sp. cepae	97.985	397	8	0	18264	18660	15977	16373	0	689
F. acutatum	F. oxysporum f. sp. cepae	92.655	354	24	2	5775	6127	3649	4001	1.51e-144	508
F. acutatum	F. oxysporum f. sp. cepae	91.385	325	15	7	49628	49942	45032	45353	9.35e-122	433
F. acutatum	F. oxysporum f. sp. cepae	80.864	324	27	17	45275	45594	42670	42962	2.2e-58	222
F. acutatum	F. oxysporum f. sp. cepae	95.356	323	15	0	7464	7786	5098	5420	3.24e-146	514
F. acutatum	F. oxysporum f. sp. cepae	85.39	308	17	14	5440	5738	3362	3650	4.6e-80	294
F. acutatum	F. oxysporum f. sp. cepae	94.558	294	9	4	50846	51133	46496	46788	3.34e-126	448
F. acutatum	F. oxysporum f. sp. cepae	87.018	285	20	6	47644	47926	41323	41592	2.13e-83	305
F. acutatum	F. oxysporum f. sp. cepae	82	250	15	11	45418	45652	43548	43782	2.89e-47	185
F. acutatum	F. oxysporum f. sp. cepae	97.551	245	5	1	20755	20998	21355	21599	2.62e-117	418
F. acutatum	F. oxysporum f. sp. cepae	89.912	228	12	5	51225	51444	46915	47139	9.96e-77	283
F. acutatum	F. oxysporum f. sp. cepae	87.981	208	16	3	45623	45830	41668	41866	7.86e-63	237
F. acutatum	F. oxysporum f. sp. cepae	94.581	203	7	2	49368	49570	44711	44909	4.57e-85	311
F. oxysporum f. sp. cepae	F. proliferatum	89.893	3918	300	59	36807	40685	35056	38916	0	4953
F. oxysporum f. sp. cepae	F. proliferatum	96.587	3399	31	15	31128	34472	29100	32467	0	5555
F. oxysporum f. sp. cepae	F. proliferatum	95.909	2762	53	21	22961	25677	20976	23722	0	4420
F. oxysporum f. sp. cepae	F. proliferatum	96.432	2382	46	25	28761	31124	26700	29060	0	3892
F. oxysporum f. sp. cepae	F. proliferatum	95.671	2310	78	13	14895	17197	12804	15098	0	3692
F. oxysporum f. sp. cepae	F. proliferatum	98.158	2280	36	4	1	2277	1	2277	0	3973
F. oxysporum f. sp. cepae	F. proliferatum	89.02	2204	173	31	40589	42741	39120	41305	0	2665
F. oxysporum f. sp. cepae	F. proliferatum	99.143	1634	14	0	19930	21563	17630	19263	0	2940
F. oxysporum f. sp. cepae	F. proliferatum	99.243	1321	10	0	7822	9142	7378	8698	0	2385
F. oxysporum f. sp. cepae	F. proliferatum	96.531	1182	39	2	18614	19794	16448	17628	0	1954
F. oxysporum f. sp. cepae	F. proliferatum	94.211	1140	38	11	12652	13789	10530	11643	0	1714
F. oxysporum f. sp. cepae	F. proliferatum	98.536	1093	13	1	26014	27103	23834	24926	0	1927
F. oxysporum f. sp. cepae	F. proliferatum	98.068	1035	16	1	4006	5040	4365	5395	0	1797
F. oxysporum f. sp. cepae	F. proliferatum	99.322	1033	7	0	5779	6811	6345	7377	0	1869
F. oxysporum f. sp. cepae	F. proliferatum	97.358	984	18	4	21878	22853	19993	20976	0	1666
F. oxysporum f. sp. cepae	F. proliferatum	98.352	971	11	4	27685	28650	25730	26700	0	1700
F. oxysporum f. sp. cepae	F. proliferatum	99.182	856	4	2	34627	35480	32474	33328	0	1539
F. oxysporum f. sp. cepae	F. proliferatum	96.178	811	21	3	17592	18395	15510	16317	0	1317
F. oxysporum f. sp. cepae	F. proliferatum	94.638	802	21	3	2392	3173	2393	3192	0	1223
F. oxysporum f. sp. cepae	F. proliferatum	89.036	757	65	7	43069	43810	41288	42041	0	922
F. oxysporum f. sp. cepae	F. proliferatum	91.104	607	21	11	45649	46246	44496	45078	0	791
F. oxysporum f. sp. cepae	F. proliferatum	89.948	577	41	12	9233	9799	8957	9526	0	728
F. oxysporum f. sp. cepae	F. proliferatum	92.091	569	8	8	35512	36051	33451	34011	0	767
F. oxysporum f. sp. cepae	F. proliferatum	92.735	468	31	1	43801	44268	42287	42751	0	673
F. oxysporum f. sp. cepae	F. proliferatum	92.308	468	22	8	27137	27591	25086	25552	0	652
F. oxysporum f. sp. cepae	F. proliferatum	97.397	461	11	1	10956	11416	10072	10531	0	784
F. oxysporum f. sp. cepae	F. proliferatum	88.063	444	34	10	44307	44740	42827	43261	1.36e-144	508
F. oxysporum f. sp. cepae	F. proliferatum	91.096	438	21	9	14362	14791	12320	12747	3.67e-165	577
F. oxysporum f. sp. cepae	F. proliferatum	97.477	436	7	3	21416	21851	19247	19678	0	741
F. oxysporum f. sp. cepae	F. proliferatum	87.283	346	20	7	3321	3650	3563	3900	5.17e-104	374
F. oxysporum f. sp. cepae	F. proliferatum	91.592	333	18	3	5098	5420	5756	6088	2.32e-127	451
F. oxysporum f. sp. cepae	F. proliferatum	81.931	321	23	19	42670	42959	39707	40023	1.97e-63	239
F. oxysporum f. sp. cepae	F. proliferatum	93.91	312	15	4	45044	45353	44043	44352	2.31e-132	468
F. oxysporum f. sp. cepae	F. proliferatum	86.817	311	29	5	3678	3977	3982	4291	6.79e-93	337
F. oxysporum f. sp. cepae	F. proliferatum	93.069	303	12	3	46487	46788	45448	45742	2.34e-122	435
F. oxysporum f. sp. cepae	F. proliferatum	83.618	293	18	11	41330	41592	41763	42055	3.27e-66	248
F. oxysporum f. sp. cepae	F. proliferatum	84.173	278	29	5	43548	43810	39850	40127	1.96e-68	255
F. oxysporum f. sp. cepae	F. proliferatum	92.308	273	14	6	36374	36640	34562	34833	3.09e-106	381
F. oxysporum f. sp. cepae	F. proliferatum	95.902	244	7	2	21355	21596	15443	15685	1.43e-109	392
F. oxysporum f. sp. cepae	F. proliferatum	93.991	233	12	1	46251	46483	45120	45350	2.42e-97	351
F. oxysporum f. sp. cepae	F. proliferatum	90.909	231	15	4	46911	47139	46094	46320	1.91e-83	305

## Sheet: Table S7
Table S7 The species and GenBank accession numbers used for phylogenetic analysis in this study
Sp. complex	Fusarium species		GenBank Accession																		Introns in PCGs
		Strain		Size (bp)	No. of Introns	atp6	atp8	atp9	cob	cox1	cox2	cox3	nad1	nad2	nad3	nad4	nad4L	nad5	nad6	rps3
FSSC	Fusarium pseudograminearum	CBS_109956	MT036638.1	1,10,526	41	2	0	1	7	16	2	4	2	4	1	0	1	1	0	0
	Fusarium acaciae-mearnsii	CBS123662	MW182649.1	1,02,172	36	1	0	1	7	12	3	3	2	4	1	0	1	1	0	0
	Fusarium aethiopicum	CBS122858	MW182651.1	1,00,557	35	1	0	0	6	13	3	3	2	4	1	0	1	1	0	0
	Fusarium cortaderiae	CBS123659	MW182662.1	94173	30	1	0	1	5	11	3	3	0	3	1	0	1	1	0	0
	Fusarium louisianense	CBS127525	MW182668.1	96101	35	1	0	1	5	12	4	3	2	4	1	0	1	1	0	0
	Fusarium culmorum	CBS 139512	NC_026993.1	1,03,844	36	1	0	1	6	12	4	3	2	4	1	0	1	1	0	0
	Fusarium cerealis	voucher 37031	NC_046567.1	93160	32	1	0	1	6	11	2	4	2	2	1	0	1	1	0	0
	Fusarium boothii	CBS110251	NC_063719.1	98485	32	1	0	1	5	11	4	3	0	4	1	0	1	1	0	0
	Fusarium ussurianum	CBS123752	NC_063726.1	99850	33	0	0	1	6	13	2	3	2	3	1	0	1	1	0	0
	Fusarium vorosii	CBS119177	NC_063727.1	1,06,714	39	1	0	1	7	13	4	4	2	4	1	0	1	1	0	0
FOSC	Fusarium oxysporum f. sp. cepae**	Fus2	BK072073	47302	2	0	0	0	1	0	0	0	0	0	0	0	0	1	0	0
	Fusarium foetens	CBS 110286	MT010932.1	46180	1	0	0	0	0	0	0	0	0	0	0	0	0	1	0	0
	Fusarium oxysporum	CBS 130302	MT010933.1	47288	2	0	0	0	1	0	0	0	0	0	0	0	0	1	0	0
	Fusarium commune	JCM11502	NC_036106.1	47526	2	0	0	0	0	0	0	0	1	0	0	0	0	1	0	0
FFSC	Fusarium proliferatum**	Fp_A8	BK071697	46542	0	0	0	0	0	0	0	0	0	0	0	0	0	0	0	0
	Fusarium concentricum	CBS 450.97	MT010911.1	46792	0	0	0	0	0	0	0	0	0	0	0	0	0	0	0	0
	Fusarium annulatum	CBS 258.54	MT010912.1	50355	0	0	0	0	0	0	0	0	0	0	0	0	0	0	0	0
	Fusarium globosum	CBS 428.97	MT010913.1	46972	0	0	0	0	0	0	0	0	0	0	0	0	0	0	0	0
	Fusarium verticillioides	CBS 576.78	MT010915.1	53759	4	0	0	0	0	2	0	0	1	1	0	0	0	0	0	0
	Fusarium musae	CBS 624.87	MT010916.1	58099	7	0	0	0	2	3	0	0	1	1	0	0	0	0	0	0
	Fusarium andiyazi	CBS 119857	MT010917.1	49861	2	0	0	0	0	1	0	0	0	1	0	0	0	0	0	0
	Fusarium napiforme	CBS 748.97	MT010918.1	65735	12	0	0	0	3	7	0	0	0	1	0	0	0	1	0	0
	Fusarium ramigenum	CBS 418.97	MT010919.1	65572	9	0	0	0	1	5	0	1	0	1	0	0	0	1	0	0
	Fusarium pseudocircinatum	CBS 449.97	MT010920.1	50881	2	0	0	0	0	1	0	0	0	1	0	0	0	0	0	0
	Fusarium ficicrescens	CBS 125178	MT010922.1	61265	4	0	0	0	2	1	0	0	0	1	0	0	0	0	0	0
	Fusarium brevicatenulatum	CBS 404.97	MT010923.1	71537	15	0	0	0	3	8	1	1	0	1	0	0	0	1	0	0
	Fusarium pseudoanthophilum	CBS 414.97	MT010924.1	70256	14	0	0	0	3	8	0	1	0	1	0	0	0	1	0	0
	Fusarium pseudonygamai	CBS 417.97	MT010925.1	65694	11	0	0	0	4	6	0	0	0	1	0	0	0	0	0	0
	Fusarium nygamai	CBS 749.97	MT010926.1	52828	4	0	0	0	0	2	0	0	1	1	0	0	0	0	0	0
	Fusarium bactridioides	CBS 100057	MT010927.1	68193	16	0	0	0	2	9	1	1	1	2	0	0	0	0	0	0
	Fusarium anthophilum	CBS 119858	MT010928.1	56307	8	0	0	0	0	5	0	0	1	2	0	0	0	0	0	0
	Fusarium begoniae	CBS 452.97	MT010929.1	75244	12	0	0	0	2	7	0	0	1	2	0	0	0	0	0	0
	Fusarium ananatum	CBS 118516	MT010930.1	68559	12	0	0	0	2	7	0	0	1	2	0	0	0	0	0	0
	Fusarium guttiforme	CBS 409.97	MT010931.1	64864	13	0	0	0	2	8	0	0	1	2	0	0	0	0	0	0
	Fusarium acutatum**	OGRDFW32	PV600497.1	51667	3	0	0	0	0	2	0	0	0	0	0	0	0	1	0	0
OUTGROUP	Ilyonectria destructans		NC_030340.1
	Calonectria ilicicola		NC_046826.1
FSSC: Fusarium sambucinum Species Complex; FOSC: Fusarium oxysporum Species Complex; FFSC: Fusarium fujikori Species Complex
** Strains reported in this study
